# Supplementary material
Source: publisher figshare collection journal article supplement (https://tandf.figshare.com/articles/dataset/_/11703033)
Supplement: Supplementary file 1 [file 1]

**Table S1.** GO analysis of *atg5*<sup>-/-</sup> MEFs in DMEM with glucose

| GO: <i>atg5</i> <sup>-/-</sup> MEF_Glucose UP   |                                          |              |             |             |                      |                         |             |           |
|-------------------------------------------------|------------------------------------------|--------------|-------------|-------------|----------------------|-------------------------|-------------|-----------|
| GO_ID                                           | Description                              | FisherPValue | FisherFDR   | FisherBonf  | nGenesIn<br>Category | nAllGenesIn<br>Category | logOR       | direction |
| GO:0062023                                      | collagen-containing_extracellular_matrix | 1.0675E-07   | 3.49074E-05 | 3.49074E-05 | 19                   | 97                      | 1.670248667 | UP        |
| GO:0005576                                      | extracellular_region                     | 4.89106E-07  | 7.99689E-05 | 0.000159938 | 27                   | 196                     | 1.25503742  | UP        |
| GO:0005615                                      | extracellular_space                      | 1.31253E-06  | 0.000143066 | 0.000429199 | 29                   | 231                     | 1.148452728 | UP        |
| GO:0005886                                      | plasma_membrane                          | 6.42018E-05  | 0.005248495 | 0.020993979 | 73                   | 999                     | 0.581216686 | UP        |
| GO:0045171                                      | intercellular_bridge                     | 0.000419755  | 0.027451976 | 0.137259878 | 7                    | 30                      | 1.909726752 | UP        |
| GO:0031012                                      | extracellular_matrix                     | 0.000513372  | 0.027978754 | 0.167872526 | 9                    | 50                      | 1.577423538 | UP        |
| GO:0005783                                      | endoplasmic_reticulum                    | 0.003121578  | 0.145822271 | 1           | 43                   | 592                     | 0.524932548 | UP        |
| GO:0045177                                      | apical_part_of_cell                      | 0.007270943  | 0.297199802 | 1           | 7                    | 48                      | 1.346789315 | UP        |
| GO:0005797                                      | Golgi_medial_cisterna                    | 0.010130084  | 0.368059717 | 1           | 3                    | 10                      | 2.303320117 | UP        |
| GO:0031514                                      | motile_cilium                            | 0.0112593    | 0.368179109 | 1           | 4                    | 19                      | 1.835529145 | UP        |
| GO:0016021                                      | integral_component_of_membrane           | 0.012632614  | 0.372234217 | 1           | 52                   | 805                     | 0.392619939 | UP        |
| GO:0048471                                      | perinuclear_region_of_cytoplasm          | 0.013659971  | 0.372234217 | 1           | 24                   | 312                     | 0.576269283 | UP        |
| GO:0005801                                      | cis-Golgi_network                        | 0.022143914  | 0.557004616 | 1           | 4                    | 23                      | 1.611649487 | UP        |
| GO:0016324                                      | apical_plasma_membrane                   | 0.025720583  | 0.60075934  | 1           | 9                    | 89                      | 0.913409019 | UP        |
| GO:0043204                                      | perikaryon                               | 0.030105433  | 0.643168149 | 1           | 5                    | 37                      | 1.294496524 | UP        |
| GO:0005739                                      | mitochondrion                            | 0.033430624  | 0.643168149 | 1           | 57                   | 946                     | 0.310242888 | UP        |
| GO:0071944                                      | cell_periphery                           | 0.033436876  | 0.643168149 | 1           | 4                    | 26                      | 1.47133511  | UP        |
| GO:0043025                                      | neuronal_cell_body                       | 0.037207099  | 0.675928966 | 1           | 16                   | 206                     | 0.592188256 | UP        |
| GO:0014704                                      | intercalated_disc                        | 0.042524732  | 0.698242632 | 1           | 4                    | 28                      | 1.387585041 | UP        |
| GO:0098793                                      | presynapse                               | 0.044396675  | 0.698242632 | 1           | 5                    | 41                      | 1.179347757 | UP        |
| GO:0043195                                      | terminal_bouton                          | 0.04484127   | 0.698242632 | 1           | 3                    | 17                      | 1.673424811 | UP        |
| GO:0005911                                      | cell-cell_junction                       | 0.049537776  | 0.736311486 | 1           | 8                    | 85                      | 0.842594881 | UP        |
| GO: <i>atg5</i> <sup>-/-</sup> MEF_Glucose DOWN |                                          |              |             |             |                      |                         |             |           |
| GO_ID                                           | Description                              | FisherPValue | FisherFDR   | FisherBonf  | nGenesIn<br>Category | nAllGenesIn<br>Category | logOR       | direction |
| GO:0005886                                      | plasma_membrane                          | 8.09217E-06  | 0.001419341 | 0.002646139 | 56                   | 999                     | 0.766489403 | DOWN      |
| GO:0005901                                      | caveola                                  | 8.68099E-06  | 0.001419341 | 0.002838682 | 8                    | 34                      | 2.34046491  | DOWN      |
| GO:0031616                                      | spindle_pole_centrosome                  | 0.00080326   | 0.087555344 | 0.262666032 | 4                    | 14                      | 2.631169518 | DOWN      |
| GO:0005911                                      | cell-cell_junction                       | 0.001508456  | 0.101638477 | 0.493265114 | 9                    | 85                      | 1.394415077 | DOWN      |
| GO:0030054                                      | cell_junction                            | 0.001554105  | 0.101638477 | 0.508192386 | 17                   | 238                     | 0.942958979 | DOWN      |
| GO:0016324                                      | apical_plasma_membrane                   | 0.002085918  | 0.113682548 | 0.682095288 | 9                    | 89                      | 1.343039145 | DOWN      |
| GO:0030175                                      | filopodium                               | 0.002797828  | 0.13069855  | 0.914889853 | 5                    | 31                      | 1.918192684 | DOWN      |
| GO:0005736                                      | RNA_polymerase_I_complex                 | 0.003318769  | 0.135654677 | 1           | 3                    | 10                      | 2.721512293 | DOWN      |
| GO:0045177                                      | apical_part_of_cell                      | 0.004059195  | 0.145716841 | 1           | 6                    | 48                      | 1.609645764 | DOWN      |
| GO:0044853                                      | plasma_membrane_raft                     | 0.004456173  | 0.145716841 | 1           | 3                    | 11                      | 2.60354854  | DOWN      |
| GO:0043005                                      | neuron_projection                        | 0.005504257  | 0.158112384 | 1           | 13                   | 182                     | 0.944719973 | DOWN      |
| GO:0030659                                      | cytoplasmic_vesicle_membrane             | 0.005802289  | 0.158112384 | 1           | 3                    | 12                      | 2.498007274 | DOWN      |
| GO:0001726                                      | ruffle                                   | 0.014014163  | 0.344043192 | 1           | 5                    | 45                      | 1.497915725 | DOWN      |
| GO:0005912                                      | adherens_junction                        | 0.014729678  | 0.344043192 | 1           | 4                    | 30                      | 1.730330947 | DOWN      |
| GO:0030424                                      | axon                                     | 0.01865429   | 0.406663518 | 1           | 10                   | 146                     | 0.908208103 | DOWN      |
| GO:0005903                                      | brush_border                             | 0.020417677  | 0.411267942 | 1           | 4                    | 33                      | 1.624426312 | DOWN      |
| GO:0005913                                      | cell-cell_adherens_junction              | 0.021380902  | 0.411267942 | 1           | 5                    | 50                      | 1.381937056 | DOWN      |
| GO:0005882                                      | intermediate_filament                    | 0.02838371   | 0.515637396 | 1           | 3                    | 21                      | 1.854525165 | DOWN      |
| GO:0005615                                      | extracellular_space                      | 0.034290542  | 0.577958221 | 1           | 13                   | 231                     | 0.682283456 | DOWN      |
| GO:0009897                                      | external_side_of_plasma_membrane         | 0.035349127  | 0.577958221 | 1           | 5                    | 57                      | 1.239012073 | DOWN      |
| GO:0005925                                      | focal_adhesion                           | 0.037590791  | 0.585342314 | 1           | 7                    | 98                      | 0.979240302 | DOWN      |
| GO:0042995                                      | cell_projection                          | 0.045439807  | 0.67017894  | 1           | 16                   | 315                     | 0.563990538 | DOWN      |

Table of gene list enrichment results for Gene Ontology: Cellular Component (GO CC) categories.

**Table S2.** GO analysis of *ulk1*<sup>-/-</sup> MEFs in DMEM with glucose

| GO: <i>ulk1</i> <sup>-/-</sup> MEF_Glucose UP   |                                                 |              |             |             |                      |                         |             |           |
|-------------------------------------------------|-------------------------------------------------|--------------|-------------|-------------|----------------------|-------------------------|-------------|-----------|
| GO_ID                                           | Description                                     | FisherPValue | FisherFDR   | FisherBonf  | nGenesIn<br>Category | nAllGenesIn<br>Category | logOR       | direction |
| GO:0016021                                      | integral_component_of_membrane                  | 2.75633E-12  | 9.01319E-10 | 9.01319E-10 | 135                  | 805                     | 0.78877235  | UP        |
| GO:0005886                                      | plasma_membrane                                 | 2.69847E-11  | 4.41199E-09 | 8.82398E-09 | 155                  | 999                     | 0.705418223 | UP        |
| GO:0005887                                      | integral_component_of_plasma_membrane           | 7.55312E-06  | 0.00082329  | 0.00246987  | 27                   | 115                     | 1.118626781 | UP        |
| GO:0098993                                      | anchored_component_of_synaptic_vesicle_membrane | 7.37329E-05  | 0.006027668 | 0.024110672 | 7                    | 13                      | 2.38705004  | UP        |
| GO:0005783                                      | endoplasmic_reticulum                           | 0.000248778  | 0.016270112 | 0.081350561 | 82                   | 592                     | 0.482060174 | UP        |
| GO:0009986                                      | cell_surface                                    | 0.001134589  | 0.061835076 | 0.371010458 | 28                   | 160                     | 0.745233811 | UP        |
| GO:0016529                                      | sarcoplasmic_reticulum                          | 0.002229876  | 0.104167082 | 0.729169573 | 8                    | 26                      | 1.505823783 | UP        |
| GO:0045335                                      | phagocytic_vesicle                              | 0.002807505  | 0.111713964 | 0.918053992 | 11                   | 45                      | 1.185040405 | UP        |
| GO:0048471                                      | perinuclear_region_of_cytoplasm                 | 0.003074696  | 0.111713964 | 1           | 45                   | 312                     | 0.511921521 | UP        |
| GO:0016324                                      | apical_plasma_membrane                          | 0.004121404  | 0.134769922 | 1           | 17                   | 89                      | 0.859170718 | UP        |
| GO:0045177                                      | apical_part_of_cell                             | 0.004798733  | 0.142165361 | 1           | 11                   | 48                      | 1.102218706 | UP        |
| GO:0005741                                      | mitochondrial_outer_membrane                    | 0.005217077  | 0.142165361 | 1           | 17                   | 91                      | 0.831750119 | UP        |
| GO:0005635                                      | nuclear_envelope                                | 0.008121633  | 0.20429031  | 1           | 17                   | 95                      | 0.779006066 | UP        |
| GO:0097038                                      | perinuclear_endoplasmic_reticulum               | 0.010980559  | 0.256474481 | 1           | 4                    | 10                      | 1.911536755 | UP        |
| GO:0005901                                      | caveola                                         | 0.01307405   | 0.263196667 | 1           | 8                    | 34                      | 1.152873704 | UP        |
| GO:0014704                                      | intercalated_disc                               | 0.014238632  | 0.263196667 | 1           | 7                    | 28                      | 1.239012165 | UP        |
| GO:0036064                                      | ciliary_basal_body                              | 0.015568068  | 0.263196667 | 1           | 8                    | 35                      | 1.116311866 | UP        |
| GO:0005923                                      | bicellular_tight_junction                       | 0.016087407  | 0.263196667 | 1           | 9                    | 42                      | 1.028197135 | UP        |
| GO:0005794                                      | Golgi_apparatus                                 | 0.01681067   | 0.263196667 | 1           | 61                   | 489                     | 0.338793732 | UP        |
| GO:0031594                                      | neuromuscular_junction                          | 0.01726242   | 0.263196667 | 1           | 7                    | 29                      | 1.194366397 | UP        |
| GO:0009897                                      | external_side_of_plasma_membrane                | 0.017825778  | 0.263196667 | 1           | 11                   | 57                      | 0.887904415 | UP        |
| GO:0030054                                      | cell_junction                                   | 0.018354216  | 0.263196667 | 1           | 33                   | 238                     | 0.461817787 | UP        |
| GO:0001669                                      | acrosomal_vesicle                               | 0.018512304  | 0.263196667 | 1           | 6                    | 23                      | 1.305087186 | UP        |
| GO:0005789                                      | endoplasmic_reticulum_membrane                  | 0.022089364  | 0.289978443 | 1           | 20                   | 130                     | 0.59242206  | UP        |
| GO:0090543                                      | Flemming_body                                   | 0.022169606  | 0.289978443 | 1           | 4                    | 12                      | 1.659835405 | UP        |
| GO:0005768                                      | endosome                                        | 0.027373445  | 0.344273706 | 1           | 37                   | 281                     | 0.399551968 | UP        |
| GO:0031225                                      | anchored_component_of_membrane                  | 0.029787333  | 0.359757359 | 1           | 5                    | 19                      | 1.332002854 | UP        |
| GO:0005615                                      | extracellular_space                             | 0.032798058  | 0.359757359 | 1           | 31                   | 231                     | 0.422908746 | UP        |
| GO:0030141                                      | secretory_granule                               | 0.033866105  | 0.359757359 | 1           | 7                    | 33                      | 1.033247349 | UP        |
| GO:0005777                                      | peroxisome                                      | 0.036004682  | 0.359757359 | 1           | 12                   | 71                      | 0.723069844 | UP        |
| GO:0043231                                      | intracellular_membrane-bounded_organelle        | 0.037918406  | 0.359757359 | 1           | 44                   | 352                     | 0.337222998 | UP        |
| GO:0043235                                      | receptor_complex                                | 0.038087304  | 0.359757359 | 1           | 8                    | 41                      | 0.920989897 | UP        |
| GO:0031982                                      | vesicle                                         | 0.038096219  | 0.359757359 | 1           | 10                   | 56                      | 0.79903947  | UP        |
| GO:0031410                                      | cytoplasmic_vesicle                             | 0.03830761   | 0.359757359 | 1           | 35                   | 270                     | 0.380843252 | UP        |
| GO:0005764                                      | lysosome                                        | 0.039450605  | 0.359757359 | 1           | 23                   | 164                     | 0.479195029 | UP        |
| GO:0005770                                      | late_endosome                                   | 0.039606315  | 0.359757359 | 1           | 12                   | 72                      | 0.706345096 | UP        |
| GO:0008021                                      | synaptic_vesicle                                | 0.042409079  | 0.374804561 | 1           | 10                   | 57                      | 0.77779111  | UP        |
| GO:0005604                                      | basement_membrane                               | 0.04517878   | 0.388775292 | 1           | 7                    | 35                      | 0.96139996  | UP        |
| GO: <i>ulk1</i> <sup>-/-</sup> MEF_Glucose DOWN |                                                 |              |             |             |                      |                         |             |           |
| GO_ID                                           | Description                                     | FisherPValue | FisherFDR   | FisherBonf  | nGenesIn<br>Category | nAllGenesIn<br>Category | logOR       | direction |
| GO:0062023                                      | collagen-containing_extracellular_matrix        | 4.65151E-25  | 1.52104E-22 | 1.52104E-22 | 41                   | 97                      | 2.52689158  | DOWN      |
| GO:0005576                                      | extracellular_region                            | 4.78186E-23  | 7.81833E-21 | 1.56367E-20 | 55                   | 196                     | 1.931438803 | DOWN      |
| GO:0005615                                      | extracellular_space                             | 2.12417E-22  | 2.31534E-20 | 6.94603E-20 | 59                   | 231                     | 1.810491516 | DOWN      |
| GO:0031012                                      | extracellular_matrix                            | 4.4506E-19   | 3.63837E-17 | 1.45535E-16 | 26                   | 50                      | 2.868425371 | DOWN      |
| GO:0001725                                      | stress_fiber                                    | 5.50799E-11  | 3.60223E-09 | 1.80111E-08 | 20                   | 57                      | 2.177839449 | DOWN      |
| GO:0005581                                      | collagen_trimer                                 | 2.03782E-09  | 1.11061E-07 | 6.66366E-07 | 11                   | 19                      | 3.03741687  | DOWN      |
| GO:0030018                                      | Z_disc                                          | 7.62373E-08  | 3.56137E-06 | 2.49296E-05 | 16                   | 54                      | 1.928462507 | DOWN      |
| GO:0005911                                      | cell-cell_junction                              | 6.29401E-07  | 2.57268E-05 | 0.000205814 | 19                   | 85                      | 1.553502657 | DOWN      |
| GO:0015629                                      | actin_cytoskeleton                              | 1.91404E-06  | 6.95434E-05 | 0.00062589  | 22                   | 117                     | 1.337124089 | DOWN      |
| GO:0009986                                      | cell_surface                                    | 3.99071E-06  | 0.000130496 | 0.001304962 | 26                   | 160                     | 1.161243504 | DOWN      |

|            |                                               |             |             |             |    |     |             |      |
|------------|-----------------------------------------------|-------------|-------------|-------------|----|-----|-------------|------|
| GO:0005604 | basement_membrane                             | 4.5778E-06  | 0.000136086 | 0.001496941 | 11 | 35  | 2.012778316 | DOWN |
| GO:0005913 | cell-cell_adherens_junction                   | 6.58917E-06 | 0.000179555 | 0.002154659 | 13 | 50  | 1.751632856 | DOWN |
| GO:0005886 | plasma_membrane                               | 1.8277E-05  | 0.000454001 | 0.005976569 | 92 | 999 | 0.557035104 | DOWN |
| GO:0030054 | cell_junction                                 | 1.94374E-05 | 0.000454001 | 0.006356014 | 32 | 238 | 0.939091196 | DOWN |
| GO:0005925 | focal_adhesion                                | 8.38497E-05 | 0.001827923 | 0.027418841 | 17 | 98  | 1.237332123 | DOWN |
| GO:0005884 | actin_filament                                | 9.8323E-05  | 0.002009476 | 0.032151619 | 12 | 55  | 1.526867869 | DOWN |
| GO:0043025 | neuronal_cell_body                            | 0.000137535 | 0.002645528 | 0.044973982 | 27 | 206 | 0.904354332 | DOWN |
| GO:0016459 | myosin_complex                                | 0.000174789 | 0.003175327 | 0.057155889 | 7  | 21  | 2.108412611 | DOWN |
| GO:0014704 | intercalated_disc                             | 0.000201532 | 0.003468466 | 0.065900863 | 8  | 28  | 1.891488966 | DOWN |
| GO:0009897 | external_side_of_plasma_membrane              | 0.000592951 | 0.009694756 | 0.193895127 | 11 | 57  | 1.377384367 | DOWN |
| GO:0005903 | brush_border                                  | 0.000686012 | 0.010682194 | 0.224326075 | 8  | 33  | 1.676980199 | DOWN |
| GO:0045121 | membrane_raft                                 | 0.000855772 | 0.012719886 | 0.279837484 | 16 | 108 | 1.049249332 | DOWN |
| GO:0030426 | growth_cone                                   | 0.002095711 | 0.029795545 | 0.685297528 | 11 | 66  | 1.200489025 | DOWN |
| GO:0005901 | caveola                                       | 0.004034662 | 0.054972266 | 1           | 7  | 34  | 1.481829075 | DOWN |
| GO:0005856 | cytoskeleton                                  | 0.005944481 | 0.077753806 | 1           | 49 | 557 | 0.448879636 | DOWN |
| GO:0042383 | sarcolemma                                    | 0.008304086 | 0.102111345 | 1           | 8  | 48  | 1.218695417 | DOWN |
| GO:0005938 | cell_cortex                                   | 0.008431212 | 0.102111345 | 1           | 9  | 58  | 1.126810004 | DOWN |
| GO:0098685 | Schaffer_collateral_-_CA1_synapse             | 0.008850461 | 0.103360743 | 1           | 7  | 39  | 1.316590132 | DOWN |
| GO:0032991 | protein-containing_complex                    | 0.013198871 | 0.146242669 | 1           | 36 | 401 | 0.464825409 | DOWN |
| GO:0008180 | COP9_signalosome                              | 0.013920945 | 0.146242669 | 1           | 5  | 24  | 1.526367704 | DOWN |
| GO:0005788 | endoplasmic_reticulum_lumen                   | 0.014133126 | 0.146242669 | 1           | 6  | 33  | 1.345419983 | DOWN |
| GO:0030863 | cortical_cytoskeleton                         | 0.014311209 | 0.146242669 | 1           | 4  | 16  | 1.773274655 | DOWN |
| GO:0001726 | ruffle                                        | 0.019037568 | 0.188644991 | 1           | 7  | 45  | 1.14841182  | DOWN |
| GO:0016324 | apical_plasma_membrane                        | 0.02012601  | 0.19356486  | 1           | 11 | 89  | 0.852057733 | DOWN |
| GO:0099092 | postsynaptic_density,_intracellular_component | 0.021829864 | 0.20334137  | 1           | 4  | 18  | 1.629800607 | DOWN |
| GO:0030425 | dendrite                                      | 0.022386206 | 0.20334137  | 1           | 17 | 163 | 0.641257687 | DOWN |
| GO:0045177 | apical_part_of_cell                           | 0.026396871 | 0.222006927 | 1           | 7  | 48  | 1.07374126  | DOWN |
| GO:0034663 | endoplasmic_reticulum_chaperone_complex       | 0.02647789  | 0.222006927 | 1           | 3  | 11  | 1.915748805 | DOWN |
| GO:0090734 | site_of_DNA_damage                            | 0.02647789  | 0.222006927 | 1           | 3  | 11  | 1.915748805 | DOWN |
| GO:0070062 | extracellular_exosome                         | 0.027224986 | 0.222564257 | 1           | 6  | 38  | 1.18018104  | DOWN |
| GO:0043005 | neuron_projection                             | 0.030775788 | 0.238580222 | 1           | 18 | 182 | 0.579333529 | DOWN |
| GO:0005719 | nuclear_euchromatin                           | 0.031372934 | 0.238580222 | 1           | 4  | 20  | 1.504264121 | DOWN |
| GO:0031941 | filamentous_actin                             | 0.031372934 | 0.238580222 | 1           | 4  | 20  | 1.504264121 | DOWN |
| GO:0030175 | filopodium                                    | 0.03916231  | 0.285682414 | 1           | 5  | 31  | 1.224954578 | DOWN |
| GO:0045202 | synapse                                       | 0.039314094 | 0.285682414 | 1           | 21 | 227 | 0.500035144 | DOWN |
| GO:0032993 | protein-DNA_complex                           | 0.043014927 | 0.305780025 | 1           | 4  | 22  | 1.392665003 | DOWN |
| GO:0005887 | integral_component_of_plasma_membrane         | 0.049975523 | 0.347702042 | 1           | 12 | 115 | 0.655343591 | DOWN |

Table of gene list enrichment results for GO\_CC categories.

**Table S3.** GO analysis of *ulk1/2*<sup>-/-</sup> MEFs in DMEM with glucose

| GO: <i>ulk1/2</i> <sup>-/-</sup> MEF_Glucose UP |                                                            |              |             |             |                      |                         |             |           |
|-------------------------------------------------|------------------------------------------------------------|--------------|-------------|-------------|----------------------|-------------------------|-------------|-----------|
| GO_ID                                           | Description                                                | FisherPValue | FisherFDR   | FisherBonf  | nGenesIn<br>Category | nAllGenesIn<br>Category | logOR       | direction |
| GO:0016021                                      | integral_component_of_membrane                             | 2.48072E-37  | 8.11195E-35 | 8.11195E-35 | 145                  | 805                     | 1.570955426 | UP        |
| GO:0005886                                      | plasma_membrane                                            | 1.98799E-27  | 3.25037E-25 | 6.50073E-25 | 147                  | 999                     | 1.297194111 | UP        |
| GO:0005783                                      | endoplasmic_reticulum                                      | 1.04086E-17  | 1.13454E-15 | 3.40362E-15 | 92                   | 592                     | 1.211104007 | UP        |
| GO:0005615                                      | extracellular_space                                        | 1.69588E-17  | 1.38638E-15 | 5.54553E-15 | 53                   | 231                     | 1.625409232 | UP        |
| GO:0009986                                      | cell_surface                                               | 1.74932E-15  | 1.14406E-13 | 5.72029E-13 | 41                   | 160                     | 1.74707804  | UP        |
| GO:0005794                                      | Golgi_apparatus                                            | 4.32537E-12  | 2.35732E-10 | 1.41439E-09 | 71                   | 489                     | 1.075450887 | UP        |
| GO:0005576                                      | extracellular_region                                       | 5.01299E-11  | 2.34178E-09 | 1.63925E-08 | 39                   | 196                     | 1.409684059 | UP        |
| GO:0005887                                      | integral_component_of_plasma_membrane                      | 2.41293E-10  | 9.86285E-09 | 7.89028E-08 | 28                   | 115                     | 1.653119043 | UP        |
| GO:0062023                                      | collagen-containing_extracellular_matrix                   | 3.43675E-09  | 1.24869E-07 | 1.12382E-06 | 24                   | 97                      | 1.668679327 | UP        |
| GO:0031012                                      | extracellular_matrix                                       | 2.95664E-08  | 9.66822E-07 | 9.66822E-06 | 16                   | 50                      | 2.015614982 | UP        |
| GO:0005604                                      | basement_membrane                                          | 8.08787E-08  | 2.4043E-06  | 2.64473E-05 | 13                   | 35                      | 2.234903206 | UP        |
| GO:0005789                                      | endoplasmic_reticulum_membrane                             | 3.47849E-07  | 9.47888E-06 | 0.000113747 | 25                   | 130                     | 1.34543259  | UP        |
| GO:0009897                                      | external_side_of_plasma_membrane                           | 1.38196E-06  | 3.47617E-05 | 0.000451902 | 15                   | 57                      | 1.744742165 | UP        |
| GO:0000139                                      | Golgi_membrane                                             | 5.66509E-06  | 0.00013232  | 0.001852483 | 16                   | 71                      | 1.541664351 | UP        |
| GO:0030176                                      | integral_component_of_endoplasmic_reticulum_membrane       | 1.38066E-05  | 0.000300983 | 0.004514748 | 12                   | 45                      | 1.764998592 | UP        |
| GO:0099055                                      | integral_component_of_postsynaptic_membrane                | 2.0944E-05   | 0.000428043 | 0.006848682 | 6                    | 11                      | 2.868752144 | UP        |
| GO:0031410                                      | cytoplasmic_vesicle                                        | 2.67893E-05  | 0.000515301 | 0.008760112 | 35                   | 270                     | 0.87565069  | UP        |
| GO:0045121                                      | membrane_raft                                              | 3.44966E-05  | 0.000626688 | 0.011280378 | 19                   | 108                     | 1.23203538  | UP        |
| GO:0016529                                      | sarcoplasmic_reticulum                                     | 0.000129705  | 0.002232297 | 0.042413639 | 8                    | 26                      | 1.970608476 | UP        |
| GO:0005788                                      | endoplasmic_reticulum_lumen                                | 0.000139079  | 0.002273945 | 0.045478894 | 9                    | 33                      | 1.803246273 | UP        |
| GO:0071782                                      | endoplasmic_reticulum_tubular_network                      | 0.00018538   | 0.002886627 | 0.060619158 | 5                    | 10                      | 2.711788523 | UP        |
| GO:0005790                                      | smooth_endoplasmic_reticulum                               | 0.000274417  | 0.004078831 | 0.089734275 | 7                    | 22                      | 2.022407746 | UP        |
| GO:0005768                                      | endosome                                                   | 0.000314836  | 0.004476152 | 0.102951505 | 33                   | 281                     | 0.756217629 | UP        |
| GO:0005765                                      | lysosomal_membrane                                         | 0.000374493  | 0.00490691  | 0.122459189 | 10                   | 45                      | 1.534696628 | UP        |
| GO:0016324                                      | apical_plasma_membrane                                     | 0.000375146  | 0.00490691  | 0.122672753 | 15                   | 89                      | 1.182424377 | UP        |
| GO:0043005                                      | neuron_projection                                          | 0.000395159  | 0.004969886 | 0.12921704  | 24                   | 182                     | 0.887647845 | UP        |
| GO:0030659                                      | cytoplasmic_vesicle_membrane                               | 0.000524361  | 0.006322529 | 0.17146617  | 5                    | 12                      | 2.423733247 | UP        |
| GO:0005764                                      | lysosome                                                   | 0.000541379  | 0.006322529 | 0.177030825 | 22                   | 164                     | 0.907476707 | UP        |
| GO:0098993                                      | anchored_component_of_synaptic_vesicle_membrane            | 0.000808462  | 0.00911611  | 0.264367188 | 5                    | 13                      | 2.305763557 | UP        |
| GO:0030054                                      | cell_junction                                              | 0.000873943  | 0.009525983 | 0.285779499 | 28                   | 238                     | 0.755017603 | UP        |
| GO:0014704                                      | intercalated_disc                                          | 0.00137211   | 0.014473544 | 0.44867987  | 7                    | 28                      | 1.70283189  | UP        |
| GO:0045335                                      | phagocytic_vesicle                                         | 0.001632729  | 0.016684446 | 0.53390227  | 9                    | 45                      | 1.408954887 | UP        |
| GO:0005911                                      | cell-cell_junction                                         | 0.002285675  | 0.020521696 | 0.747415778 | 13                   | 85                      | 1.070535881 | UP        |
| GO:0043025                                      | neuronal_cell_body                                         | 0.002306771  | 0.020521696 | 0.754313965 | 24                   | 206                     | 0.74244606  | UP        |
| GO:0042995                                      | cell_projection                                            | 0.002316615  | 0.020521696 | 0.757533096 | 33                   | 315                     | 0.621556936 | UP        |
| GO:0005797                                      | Golgi_medial_cisterna                                      | 0.002384784  | 0.020521696 | 0.779824449 | 4                    | 10                      | 2.372324651 | UP        |
| GO:0030140                                      | trans-Golgi_network_transport_vesicle                      | 0.002384784  | 0.020521696 | 0.779824449 | 4                    | 10                      | 2.372324651 | UP        |
| GO:0031527                                      | filopodium_membrane                                        | 0.002384784  | 0.020521696 | 0.779824449 | 4                    | 10                      | 2.372324651 | UP        |
| GO:0008021                                      | synaptic_vesicle                                           | 0.002580601  | 0.02115623  | 0.843856439 | 10                   | 57                      | 1.24476061  | UP        |
| GO:0030175                                      | filopodium                                                 | 0.002587918  | 0.02115623  | 0.846249183 | 7                    | 31                      | 1.574436984 | UP        |
| GO:0016323                                      | basolateral_plasma_membrane                                | 0.002767995  | 0.022076447 | 0.905134328 | 11                   | 67                      | 1.161081    | UP        |
| GO:0034663                                      | endoplasmic_reticulum_chaperone_complex                    | 0.003563284  | 0.027742712 | 1           | 4                    | 11                      | 2.238606639 | UP        |
| GO:0030424                                      | axon                                                       | 0.004354668  | 0.033115729 | 1           | 18                   | 146                     | 0.810400222 | UP        |
| GO:0005581                                      | collagen_trimer                                            | 0.005338534  | 0.03879335  | 1           | 5                    | 19                      | 1.793817276 | UP        |
| GO:0031225                                      | anchored_component_of_membrane                             | 0.005338534  | 0.03879335  | 1           | 5                    | 19                      | 1.793817276 | UP        |
| GO:0031234                                      | extrinsic_component_of_cytoplasmic_side_of_plasma_membrane | 0.005678311  | 0.040365385 | 1           | 6                    | 27                      | 1.566479621 | UP        |
| GO:0031902                                      | late_endosome_membrane                                     | 0.00685273   | 0.046597012 | 1           | 6                    | 28                      | 1.521840716 | UP        |

| GO:0048471                                        | perinuclear_region_of_cytoplasm                      | 0.006867886  | 0.046597012 | 1           | 31               | 312                 | 0.55858981  | UP        |
|---------------------------------------------------|------------------------------------------------------|--------------|-------------|-------------|------------------|---------------------|-------------|-----------|
| GO:0032588                                        | trans-Golgi_network_membrane                         | 0.006982427  | 0.046597012 | 1           | 4                | 13                  | 2.015089744 | UP        |
| GO:0043231                                        | intracellular_membrane-bounded_organelle             | 0.007289531  | 0.047004813 | 1           | 34               | 352                 | 0.526746074 | UP        |
| GO:0005769                                        | early_endosome                                       | 0.007331026  | 0.047004813 | 1           | 14               | 108                 | 0.874823906 | UP        |
| GO:0005925                                        | focal_adhesion                                       | 0.00793896   | 0.049203577 | 1           | 13               | 98                  | 0.90418893  | UP        |
| GO:0045202                                        | synapse                                              | 0.007974892  | 0.049203577 | 1           | 24               | 227                 | 0.629752281 | UP        |
| GO:0031594                                        | neuromuscular_junction                               | 0.008193601  | 0.049616804 | 1           | 6                | 29                  | 1.479093923 | UP        |
| GO:0098685                                        | Schaffer_collateral_-_CA1_synapse                    | 0.009816081  | 0.058361063 | 1           | 7                | 39                  | 1.295306278 | UP        |
| GO:0001669                                        | acrosomal_vesicle                                    | 0.012557148  | 0.070796332 | 1           | 5                | 23                  | 1.556680694 | UP        |
| GO:0005801                                        | cis-Golgi_network                                    | 0.012557148  | 0.070796332 | 1           | 5                | 23                  | 1.556680694 | UP        |
| GO:0030315                                        | T-tubule                                             | 0.012557148  | 0.070796332 | 1           | 5                | 23                  | 1.556680694 | UP        |
| GO:0043235                                        | receptor_complex                                     | 0.012883306  | 0.071404085 | 1           | 7                | 41                  | 1.236090684 | UP        |
| GO:0030141                                        | secretory_granule                                    | 0.015460543  | 0.084259961 | 1           | 6                | 33                  | 1.324194179 | UP        |
| GO:0031965                                        | nuclear_membrane                                     | 0.016083526  | 0.086218247 | 1           | 13               | 107                 | 0.802953335 | UP        |
| GO:0030496                                        | midbody                                              | 0.016735292  | 0.088265166 | 1           | 11               | 85                  | 0.883247925 | UP        |
| GO:0005802                                        | trans-Golgi_network                                  | 0.018148549  | 0.094199612 | 1           | 11               | 86                  | 0.86981368  | UP        |
| GO:0030139                                        | endocytic_vesicle                                    | 0.021035074  | 0.107427185 | 1           | 5                | 26                  | 1.409516    | UP        |
| GO:0030426                                        | growth_cone                                          | 0.021354028  | 0.107427185 | 1           | 9                | 66                  | 0.955481302 | UP        |
| GO:0055037                                        | recycling_endosome                                   | 0.023460413  | 0.116235683 | 1           | 7                | 46                  | 1.101620941 | UP        |
| GO:0030285                                        | integral_component_of_synaptic_vesicle_membrane      | 0.027878922  | 0.134064818 | 1           | 3                | 11                  | 1.894696193 | UP        |
| GO:0042470                                        | melanosome                                           | 0.027878922  | 0.134064818 | 1           | 3                | 11                  | 1.894696193 | UP        |
| GO:0005770                                        | late_endosome                                        | 0.03537361   | 0.163397055 | 1           | 9                | 72                  | 0.855910221 | UP        |
| GO:0012506                                        | vesicle_membrane                                     | 0.035477648  | 0.163397055 | 1           | 3                | 12                  | 1.789148989 | UP        |
| GO:0042734                                        | presynaptic_membrane                                 | 0.035477648  | 0.163397055 | 1           | 3                | 12                  | 1.789148989 | UP        |
| GO:0005793                                        | endoplasmic_reticulum-Golgi_intermediate_compartment | 0.03710932   | 0.16853816  | 1           | 6                | 40                  | 1.099738415 | UP        |
| GO:0005834                                        | heterotrimeric_G-protein_complex                     | 0.044026214  | 0.191954295 | 1           | 3                | 13                  | 1.693652085 | UP        |
| GO:0009925                                        | basal_plasma_membrane                                | 0.044026214  | 0.191954295 | 1           | 3                | 13                  | 1.693652085 | UP        |
| GO:0030016                                        | myofibril                                            | 0.044026214  | 0.191954295 | 1           | 3                | 13                  | 1.693652085 | UP        |
| GO:0055038                                        | recycling_endosome_membrane                          | 0.045725035  | 0.19673798  | 1           | 4                | 22                  | 1.371554086 | UP        |
| GO: <i>ulk1/2</i> <sup>-/-</sup> MEF_Glucose DOWN |                                                      |              |             |             |                  |                     |             |           |
| GO_ID                                             | Description                                          | FisherPValue | FisherFDR   | FisherBonf  | nGenesInCategory | nAllGenesInCategory | logOR       | direction |
| GO:0005747                                        | mitochondrial_respiratory_chain_complex_I            | 5.11706E-05  | 0.016732787 | 0.016732787 | 9                | 30                  | 1.956126584 | DOWN      |
| GO:0043025                                        | neuronal_cell_body                                   | 0.000322312  | 0.040977905 | 0.105396083 | 26               | 206                 | 0.862446508 | DOWN      |
| GO:0070469                                        | respiratory_chain                                    | 0.000375944  | 0.040977905 | 0.122933716 | 9                | 38                  | 1.644475769 | DOWN      |
| GO:0005856                                        | cytoskeleton                                         | 0.008996298  | 0.683058482 | 1           | 48               | 557                 | 0.426714219 | DOWN      |
| GO:0031012                                        | extracellular_matrix                                 | 0.010444319  | 0.683058482 | 1           | 8                | 50                  | 1.173774161 | DOWN      |
| GO:0009898                                        | cytoplasmic_side_of_plasma_membrane                  | 0.016358822  | 0.883073887 | 1           | 5                | 25                  | 1.480446982 | DOWN      |
| GO:0005739                                        | mitochondrion                                        | 0.018903722  | 0.883073887 | 1           | 73               | 946                 | 0.30802779  | DOWN      |
| GO:0005938                                        | cell_cortex                                          | 0.024382067  | 0.924158795 | 1           | 8                | 58                  | 1.001646861 | DOWN      |
| GO:0005581                                        | collagen_trimer                                      | 0.026099386  | 0.924158795 | 1           | 4                | 19                  | 1.568123318 | DOWN      |
| GO:0042995                                        | cell_projection                                      | 0.029549774  | 0.924158795 | 1           | 28               | 315                 | 0.454757114 | DOWN      |
| GO:0097060                                        | synaptic_membrane                                    | 0.031087911  | 0.924158795 | 1           | 4                | 20                  | 1.507312042 | DOWN      |
| GO:0043679                                        | axon_terminus                                        | 0.049199178  | 1           | 1           | 4                | 23                  | 1.344232941 | DOWN      |

Table of gene list enrichment results for GO\_CC categories.

**Table S4.** GO analysis of *atg5*<sup>-/-</sup> MEFs in DMEM with galactose

| GO: <i>atg5</i> <sup>-/-</sup> MEF_Galactose UP   |                                                                |              |             |             |                      |                         |             |           |
|---------------------------------------------------|----------------------------------------------------------------|--------------|-------------|-------------|----------------------|-------------------------|-------------|-----------|
| GO_ID                                             | Description                                                    | FisherPValue | FisherFDR   | FisherBonf  | nGenesIn<br>Category | nAllGenesIn<br>Category | logOR       | direction |
| GO:0005739                                        | mitochondrion                                                  | 2.65047E-05  | 0.008667032 | 0.008667032 | 71                   | 946                     | 0.622049831 | UP        |
| GO:0062023                                        | collagen-<br>containing_extracellular_matrix                   | 0.000171063  | 0.027968855 | 0.05593771  | 14                   | 97                      | 1.308988528 | UP        |
| GO:0045171                                        | intercellular_bridge                                           | 0.000401435  | 0.043756399 | 0.131269197 | 7                    | 30                      | 1.917585815 | UP        |
| GO:0005794                                        | Golgi_apparatus                                                | 0.001480106  | 0.120998659 | 0.483994636 | 38                   | 489                     | 0.607887064 | UP        |
| GO:0005576                                        | extracellular_region                                           | 0.005241877  | 0.324634363 | 1           | 18                   | 196                     | 0.786523587 | UP        |
| GO:0005615                                        | extracellular_space                                            | 0.006440888  | 0.324634363 | 1           | 20                   | 231                     | 0.719005058 | UP        |
| GO:0070469                                        | respiratory_chain                                              | 0.008333471  | 0.324634363 | 1           | 6                    | 38                      | 1.460189508 | UP        |
| GO:0031012                                        | extracellular_matrix                                           | 0.008750638  | 0.324634363 | 1           | 7                    | 50                      | 1.307759971 | UP        |
| GO:0014704                                        | intercalated_disc                                              | 0.009331352  | 0.324634363 | 1           | 5                    | 28                      | 1.622413071 | UP        |
| GO:0005797                                        | Golgi_medial_cisterna                                          | 0.009927656  | 0.324634363 | 1           | 3                    | 10                      | 2.311067534 | UP        |
| GO:0031514                                        | motile_cilium                                                  | 0.010978985  | 0.326375295 | 1           | 4                    | 19                      | 1.843304436 | UP        |
| GO:0000139                                        | Golgi_membrane                                                 | 0.01857815   | 0.506254598 | 1           | 8                    | 71                      | 1.050912332 | UP        |
| GO:0001750                                        | photoreceptor_outer_segment                                    | 0.021289226  | 0.517849596 | 1           | 3                    | 13                      | 1.992062788 | UP        |
| GO:0045177                                        | apical_part_of_cell                                            | 0.02498142   | 0.517849596 | 1           | 6                    | 48                      | 1.193650573 | UP        |
| GO:0016021                                        | integral_component_of_membrane                                 | 0.025068737  | 0.517849596 | 1           | 50                   | 805                     | 0.35150465  | UP        |
| GO:0005759                                        | mitochondrial_matrix                                           | 0.026898548  | 0.517849596 | 1           | 8                    | 76                      | 0.974760836 | UP        |
| GO:0005886                                        | plasma_membrane                                                | 0.026921844  | 0.517849596 | 1           | 60                   | 999                     | 0.318640781 | UP        |
| GO:0071944                                        | cell_periphery                                                 | 0.032666488  | 0.593441202 | 1           | 4                    | 26                      | 1.479110875 | UP        |
| GO:0005884                                        | actin_filament                                                 | 0.044908077  | 0.772891645 | 1           | 6                    | 55                      | 1.041533184 | UP        |
| GO: <i>atg5</i> <sup>-/-</sup> MEF_Galactose DOWN |                                                                |              |             |             |                      |                         |             |           |
| GO_ID                                             | Description                                                    | FisherPValue | FisherFDR   | FisherBonf  | nGenesIn<br>Category | nAllGenesIn<br>Category | logOR       | direction |
| GO:0005886                                        | plasma_membrane                                                | 8.95003E-13  | 2.92666E-10 | 2.92666E-10 | 76                   | 999                     | 1.137589765 | DOWN      |
| GO:0043005                                        | neuron_projection                                              | 1.3942E-05   | 0.002279514 | 0.004559028 | 19                   | 182                     | 1.290374239 | DOWN      |
| GO:0005901                                        | caveola                                                        | 0.000129488  | 0.012576803 | 0.04234266  | 7                    | 34                      | 2.102245031 | DOWN      |
| GO:0030054                                        | cell_junction                                                  | 0.000186227  | 0.012576803 | 0.060896147 | 20                   | 238                     | 1.045223675 | DOWN      |
| GO:0042995                                        | cell_projection                                                | 0.000192306  | 0.012576803 | 0.062884014 | 24                   | 315                     | 0.940649176 | DOWN      |
| GO:0031234                                        | extrinsic_component_of_cytoplasmic_<br>side_of_plasma_membrane | 0.000255865  | 0.013944623 | 0.083667735 | 6                    | 27                      | 2.205771192 | DOWN      |
| GO:0030659                                        | cytoplasmic_vesicle_membrane                                   | 0.000552666  | 0.025817391 | 0.180721739 | 4                    | 12                      | 2.75516574  | DOWN      |
| GO:0005911                                        | cell-cell_junction                                             | 0.000636723  | 0.026026058 | 0.208208461 | 10                   | 85                      | 1.42915271  | DOWN      |
| GO:0031616                                        | spindle_pole_centrosome                                        | 0.001058313  | 0.038452034 | 0.346068309 | 4                    | 14                      | 2.554132594 | DOWN      |
| GO:0005884                                        | actin_filament                                                 | 0.002642951  | 0.086424495 | 0.86424495  | 7                    | 55                      | 1.538803753 | DOWN      |
| GO:0009986                                        | cell_surface                                                   | 0.003426365  | 0.096639986 | 1           | 13                   | 160                     | 1.006542035 | DOWN      |
| GO:0031965                                        | nuclear_membrane                                               | 0.003700096  | 0.096639986 | 1           | 10                   | 107                     | 1.170875192 | DOWN      |
| GO:0030175                                        | filopodium                                                     | 0.003841957  | 0.096639986 | 1           | 5                    | 31                      | 1.840749617 | DOWN      |
| GO:0044853                                        | plasma_membrane_raft                                           | 0.005477074  | 0.127928808 | 1           | 3                    | 11                      | 2.526907088 | DOWN      |
| GO:0005887                                        | integral_component_of_plasma_membrane                          | 0.006183138  | 0.134792414 | 1           | 10                   | 115                     | 1.090929194 | DOWN      |
| GO:0015629                                        | actin_cytoskeleton                                             | 0.00697097   | 0.136542638 | 1           | 10                   | 117                     | 1.071868125 | DOWN      |
| GO:0005913                                        | cell-cell_adherens_junction                                    | 0.007098547  | 0.136542638 | 1           | 6                    | 50                      | 1.485965146 | DOWN      |
| GO:0016323                                        | basolateral_plasma_membrane                                    | 0.007996061  | 0.145261776 | 1           | 7                    | 67                      | 1.317557604 | DOWN      |
| GO:0014069                                        | postsynaptic_density                                           | 0.008837598  | 0.152099715 | 1           | 11                   | 140                     | 0.97471403  | DOWN      |
| GO:0030018                                        | Z_disc                                                         | 0.01029622   | 0.168343189 | 1           | 6                    | 54                      | 1.400077544 | DOWN      |
| GO:0016324                                        | apical_plasma_membrane                                         | 0.011424282  | 0.177892395 | 1           | 8                    | 89                      | 1.140868575 | DOWN      |
| GO:0009897                                        | external_side_of_plasma_membrane                               | 0.013285821  | 0.197475618 | 1           | 6                    | 57                      | 1.340106428 | DOWN      |
| GO:0045335                                        | phagocytic_vesicle                                             | 0.018718418  | 0.266127068 | 1           | 5                    | 45                      | 1.420466181 | DOWN      |
| GO:0005925                                        | focal_adhesion                                                 | 0.019583207  | 0.266821197 | 1           | 8                    | 98                      | 1.03507436  | DOWN      |
| GO:0045177                                        | apical_part_of_cell                                            | 0.024150345  | 0.314125107 | 1           | 5                    | 48                      | 1.349301717 | DOWN      |
| GO:0030426                                        | growth_cone                                                    | 0.025795035  | 0.314125107 | 1           | 6                    | 66                      | 1.178831395 | DOWN      |
| GO:0005903                                        | brush_border                                                   | 0.025936935  | 0.314125107 | 1           | 4                    | 33                      | 1.547380641 | DOWN      |
| GO:0005615                                        | extracellular_space                                            | 0.028495826  | 0.332790535 | 1           | 14                   | 231                     | 0.680546427 | DOWN      |
| GO:0032587                                        | ruffle_membrane                                                | 0.034477099  | 0.388759018 | 1           | 4                    | 36                      | 1.451524659 | DOWN      |
| GO:0030027                                        | lamellipodium                                                  | 0.037350618  | 0.407121737 | 1           | 7                    | 91                      | 0.981380572 | DOWN      |
| GO:0070062                                        | extracellular_exosome                                          | 0.04097606   | 0.429171927 | 1           | 4                    | 38                      | 1.392320126 | DOWN      |

|            |                          |             |             |   |   |    |             |      |
|------------|--------------------------|-------------|-------------|---|---|----|-------------|------|
| GO:0030315 | T-tubule                 | 0.043394547 | 0.429171927 | 1 | 3 | 23 | 1.677432553 | DOWN |
| GO:0005736 | RNA_polymerase_I_complex | 0.044623381 | 0.429171927 | 1 | 2 | 10 | 2.234135946 | DOWN |
| GO:0101031 | chaperone_complex        | 0.044623381 | 0.429171927 | 1 | 2 | 10 | 2.234135946 | DOWN |

Table of gene list enrichment results for GO\_CC categories.



**Table S5.** GO analysis of *ulk1*<sup>-/-</sup> MEFs in DMEM with galactose

| GO: <i>ulk1</i> <sup>-/-</sup> MEF_Galactose UP   |                                                              |              |             |             |                      |                         |             |           |
|---------------------------------------------------|--------------------------------------------------------------|--------------|-------------|-------------|----------------------|-------------------------|-------------|-----------|
| GO_ID                                             | Description                                                  | FisherPValue | FisherFDR   | FisherBonf  | nGenesIn<br>Category | nAllGenesIn<br>Category | logOR       | direction |
| GO:0005615                                        | extracellular_space                                          | 1.36629E-06  | 0.000446778 | 0.000446778 | 43                   | 231                     | 0.928288363 | UP        |
| GO:0000176                                        | nuclear_exosome_(RNase_complex)                              | 2.36432E-05  | 0.003865659 | 0.007731318 | 8                    | 16                      | 2.348118861 | UP        |
| GO:0005736                                        | RNA_polymerase_I_complex                                     | 7.06688E-05  | 0.006465579 | 0.023108709 | 6                    | 10                      | 2.681350242 | UP        |
| GO:0005764                                        | lysosome                                                     | 7.90896E-05  | 0.006465579 | 0.025862314 | 30                   | 164                     | 0.897541518 | UP        |
| GO:0000178                                        | exosome_(RNase_complex)                                      | 0.000137055  | 0.008963386 | 0.044816931 | 7                    | 15                      | 2.228329807 | UP        |
| GO:0005739                                        | mitochondrion                                                | 0.0003308    | 0.018028613 | 0.108171677 | 112                  | 946                     | 0.409778114 | UP        |
| GO:0005576                                        | extracellular_region                                         | 0.000414351  | 0.019356093 | 0.135492654 | 32                   | 196                     | 0.757685702 | UP        |
| GO:0000177                                        | cytoplasmic_exosome_(RNase_complex)                          | 0.002456928  | 0.100426948 | 0.803415587 | 5                    | 12                      | 2.054622611 | UP        |
| GO:0005758                                        | mitochondrial_intermembrane_space                            | 0.006884265  | 0.2501283   | 1           | 9                    | 40                      | 1.182555443 | UP        |
| GO:0005887                                        | integral_component_of_plasma_membrane                        | 0.011323135  | 0.349345101 | 1           | 18                   | 115                     | 0.710651579 | UP        |
| GO:0030315                                        | T-tubule                                                     | 0.012583525  | 0.349345101 | 1           | 6                    | 23                      | 1.397920954 | UP        |
| GO:0005730                                        | nucleolus                                                    | 0.012820004  | 0.349345101 | 1           | 52                   | 435                     | 0.385602136 | UP        |
| GO:0031225                                        | anchored_component_of_membrane                               | 0.021509455  | 0.499333146 | 1           | 5                    | 19                      | 1.424670253 | UP        |
| GO:0009925                                        | basal_plasma_membrane                                        | 0.022474007  | 0.499333146 | 1           | 4                    | 13                      | 1.646779755 | UP        |
| GO:0016529                                        | sarcoplasmic_reticulum                                       | 0.02290519   | 0.499333146 | 1           | 6                    | 26                      | 1.243193517 | UP        |
| GO:0005923                                        | bicellular_tight_junction                                    | 0.02809678   | 0.574227932 | 1           | 8                    | 42                      | 0.984994405 | UP        |
| GO:0005759                                        | mitochondrial_matrix                                         | 0.032898867  | 0.606104979 | 1           | 12                   | 76                      | 0.735942934 | UP        |
| GO:0005743                                        | mitochondrial_inner_membrane                                 | 0.033363577  | 0.606104979 | 1           | 29                   | 232                     | 0.436148321 | UP        |
| GO:0005847                                        | mRNA_cleavage_and_polyadenylation_specificity_factor_complex | 0.037274188  | 0.614126661 | 1           | 4                    | 15                      | 1.464074321 | UP        |
| GO:0016021                                        | integral_component_of_membrane                               | 0.037561264  | 0.614126661 | 1           | 85                   | 805                     | 0.242908001 | UP        |
| GO: <i>ulk1</i> <sup>-/-</sup> MEF_Galactose DOWN |                                                              |              |             |             |                      |                         |             |           |
| GO_ID                                             | Description                                                  | FisherPValue | FisherFDR   | FisherBonf  | nGenesIn<br>Category | nAllGenesIn<br>Category | logOR       | direction |
| GO:0001725                                        | stress_fiber                                                 | 1.08628E-15  | 3.55215E-13 | 3.55215E-13 | 26                   | 57                      | 2.454883069 | DOWN      |
| GO:0005886                                        | plasma_membrane                                              | 1.55296E-12  | 2.5391E-10  | 5.07819E-10 | 127                  | 999                     | 0.837722785 | DOWN      |
| GO:0015629                                        | actin_cytoskeleton                                           | 1.16103E-11  | 1.26553E-09 | 3.79658E-09 | 32                   | 117                     | 1.672463971 | DOWN      |
| GO:0062023                                        | collagen-containing_extracellular_matrix                     | 1.71299E-09  | 1.40037E-07 | 5.60148E-07 | 26                   | 97                      | 1.636356918 | DOWN      |
| GO:0030018                                        | Z_disc                                                       | 1.3813E-08   | 9.03372E-07 | 4.51686E-06 | 18                   | 54                      | 1.936684259 | DOWN      |
| GO:0005615                                        | extracellular_space                                          | 2.7228E-08   | 1.48393E-06 | 8.90356E-06 | 41                   | 231                     | 1.119589224 | DOWN      |
| GO:0005911                                        | cell-cell_junction                                           | 6.33054E-08  | 2.95727E-06 | 2.07009E-05 | 22                   | 85                      | 1.58493141  | DOWN      |
| GO:0043025                                        | neuronal_cell_body                                           | 9.8699E-08   | 4.03432E-06 | 3.22746E-05 | 37                   | 206                     | 1.129257437 | DOWN      |
| GO:0031012                                        | extracellular_matrix                                         | 1.71534E-07  | 6.23242E-06 | 5.60918E-05 | 16                   | 50                      | 1.876305068 | DOWN      |
| GO:0005856                                        | cytoskeleton                                                 | 1.9563E-07   | 6.39709E-06 | 6.39709E-05 | 72                   | 557                     | 0.767183627 | DOWN      |
| GO:0005925                                        | focal_adhesion                                               | 2.23102E-07  | 6.63221E-06 | 7.29543E-05 | 23                   | 98                      | 1.455941504 | DOWN      |
| GO:0005884                                        | actin_filament                                               | 4.06503E-06  | 0.000110772 | 0.001329264 | 15                   | 55                      | 1.65377878  | DOWN      |
| GO:0005576                                        | extracellular_region                                         | 6.43933E-06  | 0.000161974 | 0.00210566  | 32                   | 196                     | 1.005651248 | DOWN      |
| GO:0005581                                        | collagen_trimer                                              | 2.33639E-05  | 0.000545714 | 0.007639991 | 8                    | 19                      | 2.294950035 | DOWN      |
| GO:0005903                                        | brush_border                                                 | 6.32517E-05  | 0.001378888 | 0.020683313 | 10                   | 33                      | 1.805209408 | DOWN      |
| GO:0014704                                        | intercalated_disc                                            | 8.85889E-05  | 0.001810536 | 0.028968582 | 9                    | 28                      | 1.890472942 | DOWN      |
| GO:0043209                                        | myelin_sheath                                                | 0.000268377  | 0.005162301 | 0.087759116 | 21                   | 129                     | 0.996832409 | DOWN      |
| GO:0030054                                        | cell_junction                                                | 0.000315371  | 0.005729244 | 0.103126388 | 32                   | 238                     | 0.77069394  | DOWN      |
| GO:0005913                                        | cell-cell_adherens_junction                                  | 0.000621556  | 0.010697314 | 0.203248973 | 11                   | 50                      | 1.380877707 | DOWN      |
| GO:0032991                                        | protein-containing_complex                                   | 0.000695671  | 0.011374217 | 0.227484342 | 46                   | 401                     | 0.590378201 | DOWN      |
| GO:0015630                                        | microtubule_cytoskeleton                                     | 0.001087101  | 0.016927708 | 0.355481877 | 15                   | 87                      | 1.070808893 | DOWN      |
| GO:0030175                                        | filopodium                                                   | 0.001139553  | 0.016937901 | 0.372633818 | 8                    | 31                      | 1.599538702 | DOWN      |
| GO:0042383                                        | sarcolemma                                                   | 0.001701048  | 0.023727966 | 0.556242596 | 10                   | 48                      | 1.316864175 | DOWN      |
| GO:0030027                                        | lamellipodium                                                | 0.001741502  | 0.023727966 | 0.569471178 | 15                   | 91                      | 1.01669999  | DOWN      |
| GO:0043005                                        | neuron_projection                                            | 0.00228976   | 0.029950061 | 0.748751532 | 24                   | 182                     | 0.74522633  | DOWN      |
| GO:0016459                                        | myosin_complex                                               | 0.002730022  | 0.034335276 | 0.892717189 | 6                    | 21                      | 1.750224252 | DOWN      |
| GO:0030424                                        | axon                                                         | 0.00333277   | 0.040363542 | 1           | 20                   | 146                     | 0.791437643 | DOWN      |



|            |                                                       |             |             |   |    |     |             |      |
|------------|-------------------------------------------------------|-------------|-------------|---|----|-----|-------------|------|
| GO:0045177 | apical_part_of_cell                                   | 0.006019059 | 0.070294014 | 1 | 9  | 48  | 1.193543609 | DOWN |
| GO:0030426 | growth_cone                                           | 0.006375407 | 0.071888205 | 1 | 11 | 66  | 1.041369415 | DOWN |
| GO:0045121 | membrane_raft                                         | 0.009148909 | 0.099723109 | 1 | 15 | 108 | 0.813961702 | DOWN |
| GO:0005604 | basement_membrane                                     | 0.010423613 | 0.109952304 | 1 | 7  | 35  | 1.289078094 | DOWN |
| GO:0017101 | aminoacyl-<br>tRNA_synthetase_multienzyme_compl<br>ex | 0.010842651 | 0.110798336 | 1 | 4  | 13  | 1.879936148 | DOWN |
| GO:0031941 | filamentous_actin                                     | 0.011377062 | 0.112736337 | 1 | 5  | 20  | 1.593595256 | DOWN |
| GO:0001726 | ruffle                                                | 0.01296032  | 0.124057002 | 1 | 8  | 45  | 1.137358367 | DOWN |
| GO:0048471 | perinuclear_region_of_cytoplasm                       | 0.013278272 | 0.124057002 | 1 | 33 | 312 | 0.486746235 | DOWN |
| GO:0070062 | extracellular_exosome                                 | 0.016276466 | 0.147844562 | 1 | 7  | 38  | 1.190070645 | DOWN |
| GO:0005868 | cytoplasmic_dynein_complex                            | 0.018478856 | 0.163313137 | 1 | 4  | 15  | 1.69723773  | DOWN |
| GO:0043679 | axon_terminus                                         | 0.020704918 | 0.178171266 | 1 | 5  | 23  | 1.421179015 | DOWN |
| GO:0030425 | dendrite                                              | 0.022138947 | 0.185626559 | 1 | 19 | 163 | 0.604059862 | DOWN |
| GO:0005901 | caveola                                               | 0.030892672 | 0.252547596 | 1 | 6  | 34  | 1.153062228 | DOWN |
| GO:0043034 | costamere                                             | 0.038580478 | 0.295816008 | 1 | 3  | 11  | 1.759875397 | DOWN |
| GO:0042995 | cell_projection                                       | 0.039397065 | 0.295816008 | 1 | 31 | 315 | 0.402124034 | DOWN |
| GO:0032587 | ruffle_membrane                                       | 0.039719327 | 0.295816008 | 1 | 6  | 36  | 1.085992639 | DOWN |
| GO:0014069 | postsynaptic_density                                  | 0.039803989 | 0.295816008 | 1 | 16 | 140 | 0.586156839 | DOWN |
| GO:0002102 | podosome                                              | 0.041898543 | 0.304462744 | 1 | 4  | 19  | 1.40880151  | DOWN |
| GO:0032839 | dendrite_cytoplasm                                    | 0.048791775 | 0.346845876 | 1 | 3  | 12  | 1.654326504 | DOWN |

Table of gene list enrichment results for GO\_CC categories.

**Table S6.** GO analysis of *ulk1/2*<sup>-/-</sup> MEFs in DMEM with galactose

| GO: <i>ulk1/2</i> <sup>-/-</sup> MEF_Galactose UP |                                              |              |             |             |                      |                         |             |           |
|---------------------------------------------------|----------------------------------------------|--------------|-------------|-------------|----------------------|-------------------------|-------------|-----------|
| GO_ID                                             | Description                                  | FisherPValue | FisherFDR   | FisherBonf  | nGenesIn<br>Category | nAllGenesIn<br>Category | logOR       | direction |
| GO:0005886                                        | plasma_membrane                              | 3.56985E-14  | 1.16734E-11 | 1.16734E-11 | 123                  | 999                     | 0.924806704 | UP        |
| GO:0005615                                        | extracellular_space                          | 1.53004E-10  | 2.50162E-08 | 5.00325E-08 | 43                   | 231                     | 1.289790995 | UP        |
| GO:0062023                                        | collagen-<br>containing_extracellular_matrix | 6.99125E-09  | 7.62046E-07 | 2.28614E-06 | 24                   | 97                      | 1.628369542 | UP        |
| GO:0031012                                        | extracellular_matrix                         | 4.88745E-08  | 3.99549E-06 | 1.5982E-05  | 16                   | 50                      | 1.976184868 | UP        |
| GO:0005576                                        | extracellular_region                         | 9.09282E-08  | 5.9467E-06  | 2.97335E-05 | 34                   | 196                     | 1.187141219 | UP        |
| GO:0009986                                        | cell_surface                                 | 3.22292E-07  | 1.75649E-05 | 0.000105389 | 29                   | 160                     | 1.235295275 | UP        |
| GO:0005925                                        | focal_adhesion                               | 8.57393E-07  | 4.00525E-05 | 0.000280367 | 21                   | 98                      | 1.438599528 | UP        |
| GO:0005604                                        | basement_membrane                            | 7.80746E-06  | 0.00031913  | 0.00255304  | 11                   | 35                      | 1.952359203 | UP        |
| GO:0005581                                        | collagen_trimer                              | 1.2065E-05   | 0.000438361 | 0.003945249 | 8                    | 19                      | 2.392852774 | UP        |
| GO:0016021                                        | integral_component_of_membrane               | 3.86413E-05  | 0.001263569 | 0.012635693 | 80                   | 805                     | 0.562983361 | UP        |
| GO:0001725                                        | stress_fiber                                 | 5.46334E-05  | 0.001624102 | 0.017865122 | 13                   | 57                      | 1.520487277 | UP        |
| GO:0005834                                        | heterotrimeric_G-protein_complex             | 8.52535E-05  | 0.002323158 | 0.027877897 | 6                    | 13                      | 2.542302493 | UP        |
| GO:0030054                                        | cell_junction                                | 0.000139341  | 0.003504953 | 0.045564394 | 31                   | 238                     | 0.836248024 | UP        |
| GO:0005856                                        | cytoskeleton                                 | 0.000289349  | 0.006758366 | 0.094617129 | 57                   | 557                     | 0.572081406 | UP        |
| GO:0031594                                        | neuromuscular_junction                       | 0.000384294  | 0.008377609 | 0.125664141 | 8                    | 29                      | 1.784842907 | UP        |
| GO:0016529                                        | sarcoplasmic_reticulum                       | 0.00105006   | 0.021460596 | 0.343369541 | 7                    | 26                      | 1.760016631 | UP        |
| GO:0005923                                        | bicellular_tight_junction                    | 0.0012505    | 0.024053734 | 0.408913473 | 9                    | 42                      | 1.45536781  | UP        |
| GO:0005783                                        | endoplasmic_reticulum                        | 0.001339063  | 0.024326317 | 0.43787371  | 57                   | 592                     | 0.497313682 | UP        |
| GO:0016324                                        | apical_plasma_membrane                       | 0.001667082  | 0.028185919 | 0.545135895 | 14                   | 89                      | 1.062325863 | UP        |
| GO:0016459                                        | myosin_complex                               | 0.001723909  | 0.028185919 | 0.563718384 | 6                    | 21                      | 1.847657465 | UP        |
| GO:0005790                                        | smooth_endoplasmic_reticulum                 | 0.002242246  | 0.034914974 | 0.733214457 | 6                    | 22                      | 1.786845454 | UP        |
| GO:0098685                                        | Schaffer_collateral_-_CA1_synapse            | 0.003103997  | 0.044985808 | 1           | 8                    | 39                      | 1.408271876 | UP        |
| GO:0030175                                        | filopodium                                   | 0.003164139  | 0.044985808 | 1           | 7                    | 31                      | 1.535935081 | UP        |
| GO:0009897                                        | external_side_of_plasma_membrane             | 0.003342931  | 0.045547431 | 1           | 10                   | 57                      | 1.205945445 | UP        |
| GO:0045121                                        | membrane_raft                                | 0.004042241  | 0.052872506 | 1           | 15                   | 108                     | 0.913667725 | UP        |
| GO:0005789                                        | endoplasmic_reticulum_membrane               | 0.004308934  | 0.054193132 | 1           | 17                   | 130                     | 0.840323447 | UP        |
| GO:0043025                                        | neuronal_cell_body                           | 0.007406409  | 0.089699842 | 1           | 23                   | 206                     | 0.652766374 | UP        |
| GO:0005884                                        | actin_filament                               | 0.008429376  | 0.096301538 | 1           | 9                    | 55                      | 1.129133672 | UP        |
| GO:0015629                                        | actin_cytoskeleton                           | 0.008540503  | 0.096301538 | 1           | 15                   | 117                     | 0.820520701 | UP        |
| GO:0048471                                        | perinuclear_region_of_cytoplasm              | 0.01126914   | 0.122833631 | 1           | 31                   | 312                     | 0.5173917   | UP        |
| GO:0001669                                        | acrosomal_vesicle                            | 0.014493801  | 0.146919545 | 1           | 5                    | 23                      | 1.518380551 | UP        |
| GO:0005913                                        | cell-cell_adherens_junction                  | 0.014499942  | 0.146919545 | 1           | 8                    | 50                      | 1.110738242 | UP        |
| GO:0098978                                        | glutamatergic_synapse                        | 0.015072628  | 0.146919545 | 1           | 20                   | 183                     | 0.629655376 | UP        |
| GO:0043235                                        | receptor_complex                             | 0.015444734  | 0.146919545 | 1           | 7                    | 41                      | 1.197584204 | UP        |
| GO:0005794                                        | Golgi_apparatus                              | 0.015725334  | 0.146919545 | 1           | 44                   | 489                     | 0.405668919 | UP        |
| GO:0005887                                        | integral_component_of_plasma_membrane        | 0.016691915  | 0.151618229 | 1           | 14                   | 115                     | 0.76314717  | UP        |
| GO:0005911                                        | cell-cell_junction                           | 0.021240085  | 0.187716424 | 1           | 11                   | 85                      | 0.844318219 | UP        |
| GO:0005797                                        | Golgi_medial_cisterna                        | 0.023352106  | 0.200951015 | 1           | 3                    | 10                      | 1.97456758  | UP        |
| GO:0030139                                        | endocytic_vesicle                            | 0.024144351  | 0.202441098 | 1           | 5                    | 26                      | 1.371214489 | UP        |
| GO:0032587                                        | ruffle_membrane                              | 0.027110364  | 0.221627226 | 1           | 6                    | 36                      | 1.183444458 | UP        |
| GO:0034663                                        | endoplasmic_reticulum_chaperone_complex      | 0.030588528  | 0.238153538 | 1           | 3                    | 11                      | 1.856597436 | UP        |
| GO:0099055                                        | integral_component_of_postsynaptic_membrane  | 0.030588528  | 0.238153538 | 1           | 3                    | 11                      | 1.856597436 | UP        |
| GO:0014704                                        | intercalated_disc                            | 0.032440869  | 0.246701489 | 1           | 5                    | 28                      | 1.283827877 | UP        |
| GO:0045177                                        | apical_part_of_cell                          | 0.034308331  | 0.254973281 | 1           | 7                    | 48                      | 1.013945496 | UP        |
| GO:0030425                                        | dendrite                                     | 0.035615308  | 0.25880457  | 1           | 17                   | 163                     | 0.579770475 | UP        |
| GO:0014069                                        | postsynaptic_density                         | 0.038076696  | 0.270675647 | 1           | 15                   | 140                     | 0.614577206 | UP        |
| GO:0005635                                        | nuclear_envelope                             | 0.043702088  | 0.304054954 | 1           | 11                   | 95                      | 0.717258622 | UP        |
| GO:0030496                                        | midbody                                      | 0.048389267  | 0.329651884 | 1           | 10                   | 85                      | 0.741121098 | UP        |

| GO: <i>ulk1/2</i> <sup>-/-</sup> MEF_Galactose DOWN |                                               |              |             |             |                      |                         |             |           |
|-----------------------------------------------------|-----------------------------------------------|--------------|-------------|-------------|----------------------|-------------------------|-------------|-----------|
| GO_ID                                               | Description                                   | FisherPValue | FisherFDR   | FisherBonf  | nGenesIn<br>Category | nAllGenesIn<br>Category | logOR       | direction |
| GO:0005747                                          | mitochondrial_respiratory_chain_complex_I     | 6.28863E-11  | 2.05638E-08 | 2.05638E-08 | 16                   | 30                      | 2.640509438 | DOWN      |
| GO:0005739                                          | mitochondrion                                 | 1.17013E-09  | 1.91316E-07 | 3.82632E-07 | 121                  | 946                     | 0.718664953 | DOWN      |
| GO:0070469                                          | respiratory_chain                             | 5.38475E-09  | 5.86937E-07 | 1.76081E-06 | 16                   | 38                      | 2.211546243 | DOWN      |
| GO:0005743                                          | mitochondrial_inner_membrane                  | 1.31575E-05  | 0.001075623 | 0.004302494 | 37                   | 232                     | 0.89042106  | DOWN      |
| GO:0031966                                          | mitochondrial_membrane                        | 0.001258214  | 0.082287179 | 0.411435895 | 10                   | 43                      | 1.369282974 | DOWN      |
| GO:0005576                                          | extracellular_region                          | 0.002030435  | 0.110658684 | 0.663952107 | 27                   | 196                     | 0.708060231 | DOWN      |
| GO:0071944                                          | cell_periphery                                | 0.002783078  | 0.130009503 | 0.910066524 | 7                    | 26                      | 1.577199662 | DOWN      |
| GO:0030122                                          | AP-2_adaptor_complex                          | 0.005017425  | 0.205087259 | 1           | 4                    | 10                      | 2.15261137  | DOWN      |
| GO:0043195                                          | terminal_bouton                               | 0.007545797  | 0.274163969 | 1           | 5                    | 17                      | 1.717041993 | DOWN      |
| GO:0043209                                          | myelin_sheath                                 | 0.009511631  | 0.311030349 | 1           | 18                   | 129                     | 0.727414723 | DOWN      |
| GO:0005759                                          | mitochondrial_matrix                          | 0.01260347   | 0.374666801 | 1           | 12                   | 76                      | 0.88702956  | DOWN      |
| GO:0017101                                          | aminoacyl-tRNA_synthetase_multienzyme_complex | 0.014190417  | 0.386473392 | 1           | 4                    | 13                      | 1.795367867 | DOWN      |
| GO:0010008                                          | endosome_membrane                             | 0.015364386  | 0.386473392 | 1           | 8                    | 43                      | 1.106453966 | DOWN      |
| GO:0005615                                          | extracellular_space                           | 0.0182501    | 0.426270188 | 1           | 27                   | 231                     | 0.513982551 | DOWN      |
| GO:0062023                                          | collagen-containing_extracellular_matrix      | 0.034076885  | 0.684518284 | 1           | 13                   | 97                      | 0.691363059 | DOWN      |
| GO:0098793                                          | presynapse                                    | 0.035055611  | 0.684518284 | 1           | 7                    | 41                      | 1.014730805 | DOWN      |
| GO:0031012                                          | extracellular_matrix                          | 0.035586577  | 0.684518284 | 1           | 8                    | 50                      | 0.927438311 | DOWN      |
| GO:0043025                                          | neuronal_cell_body                            | 0.044191822  | 0.77012901  | 1           | 23                   | 206                     | 0.462439031 | DOWN      |
| GO:0099092                                          | postsynaptic_density_intracellular_component  | 0.044747557  | 0.77012901  | 1           | 4                    | 18                      | 1.388954442 | DOWN      |

Table of gene list enrichment results for GO\_CC categories.
