# Supplementary material
Source: publisher figshare collection journal article supplement (https://tandf.figshare.com/articles/dataset/_/11703033)

Figure S1, related to Fig. 2

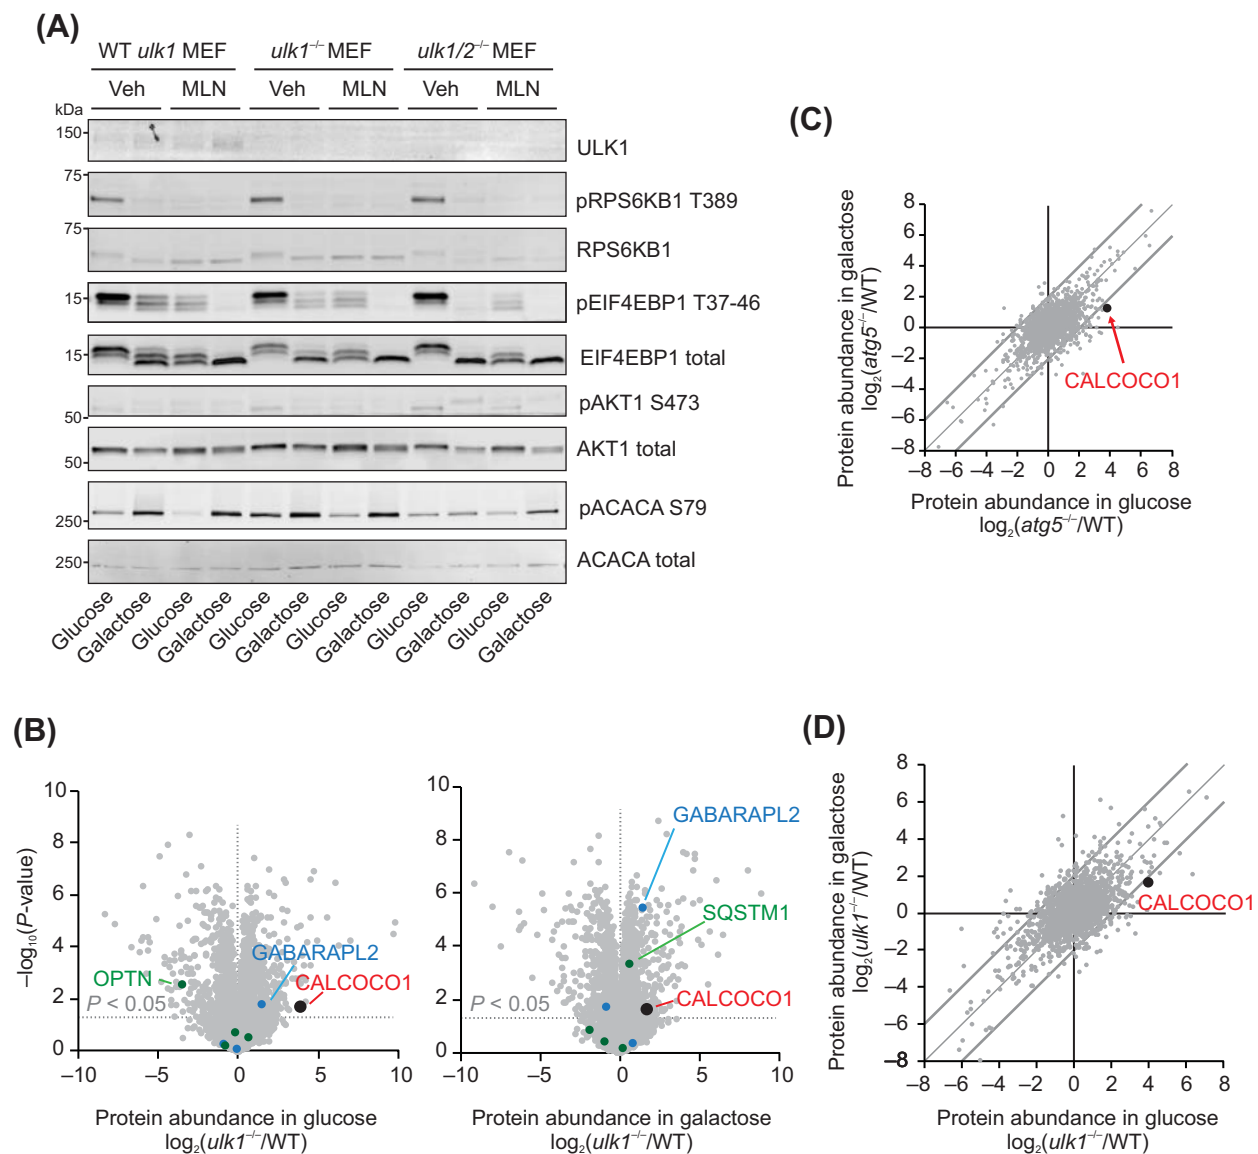

Figure S2, related to Fig. 3

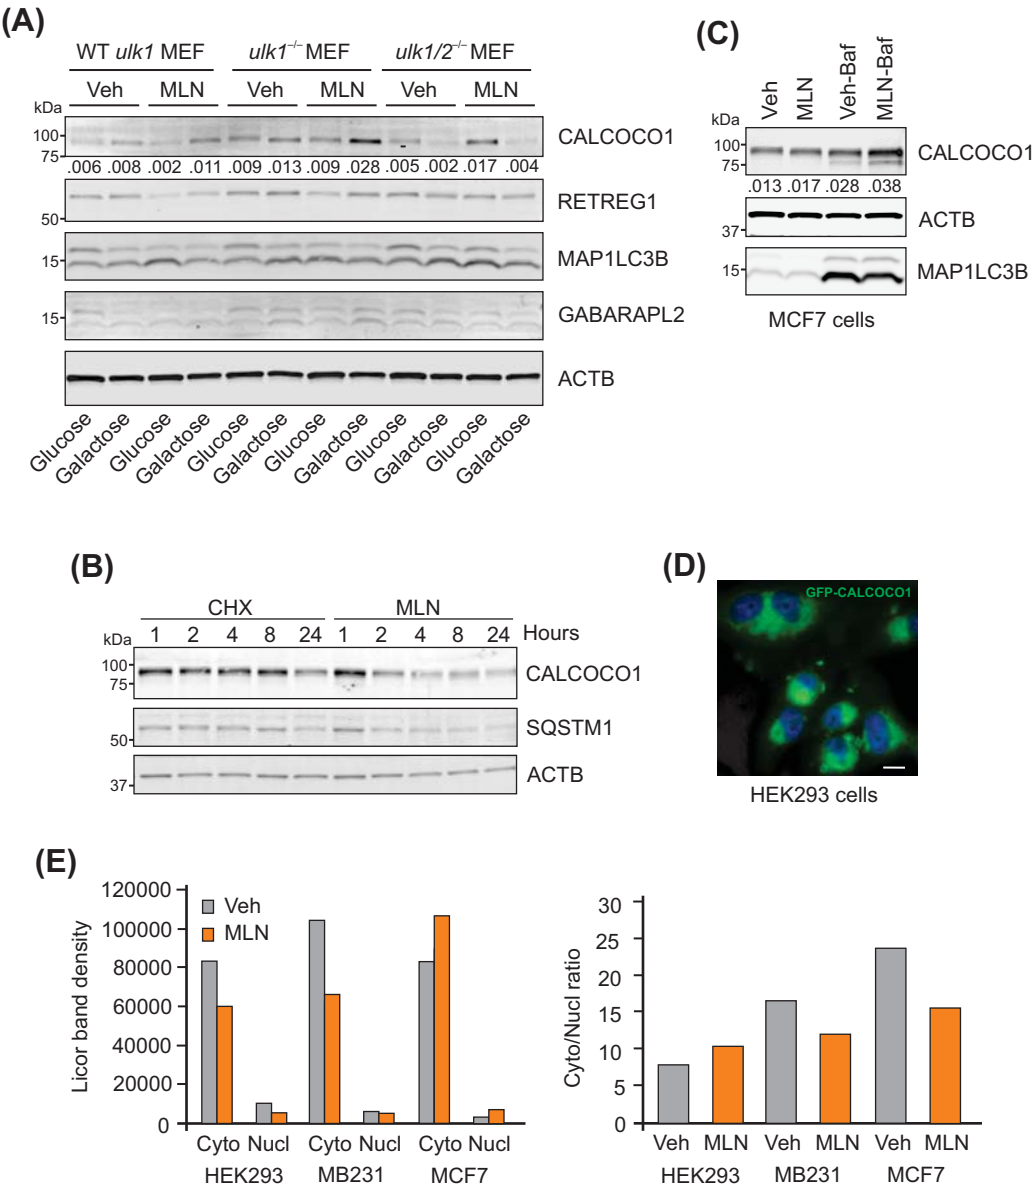

Figure S3, related to Fig. 3

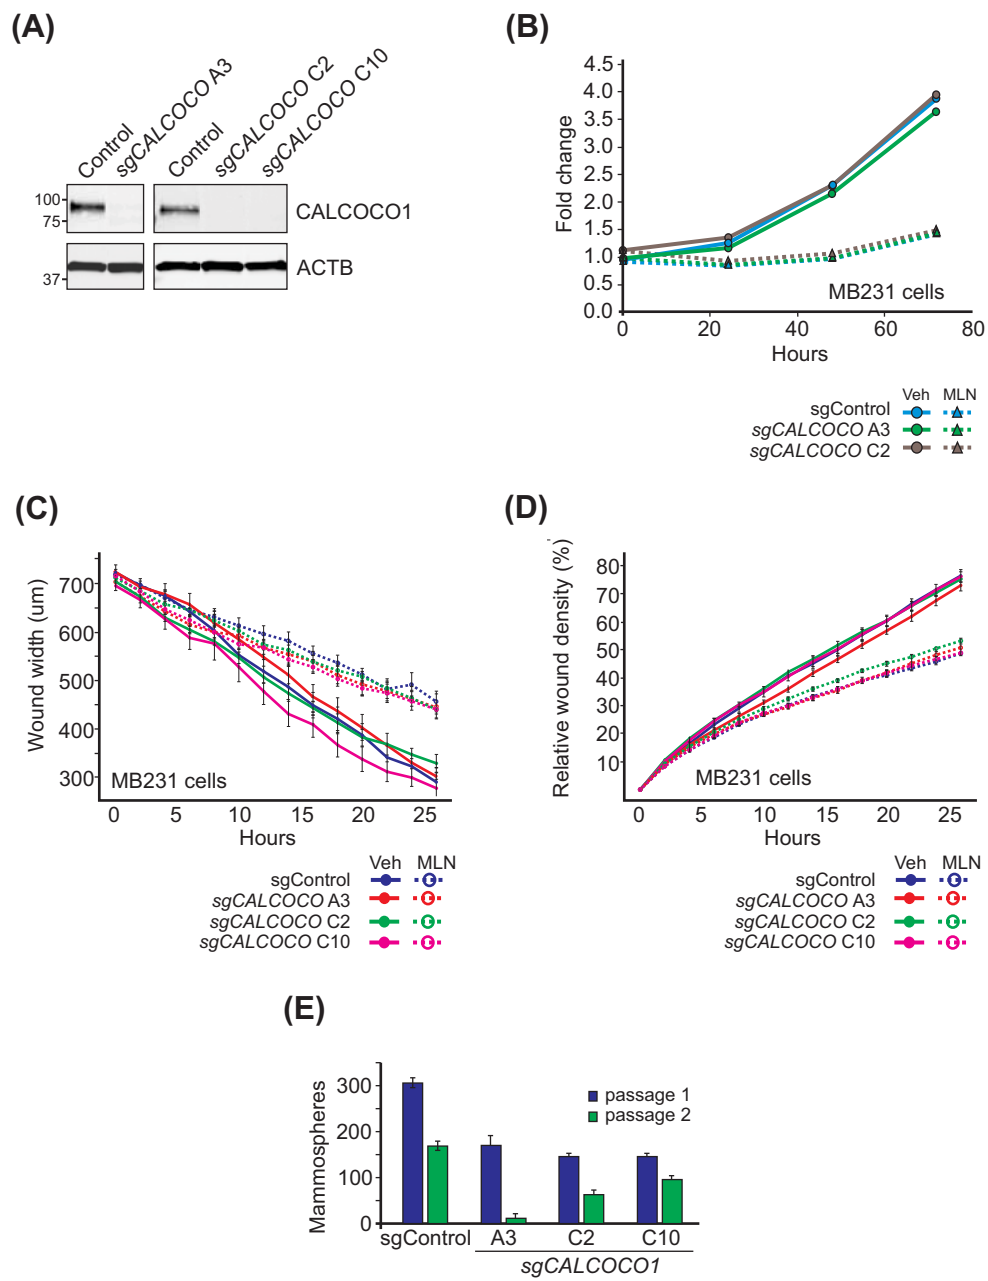

**Figure S4, related to Fig. 4**

**(A)**

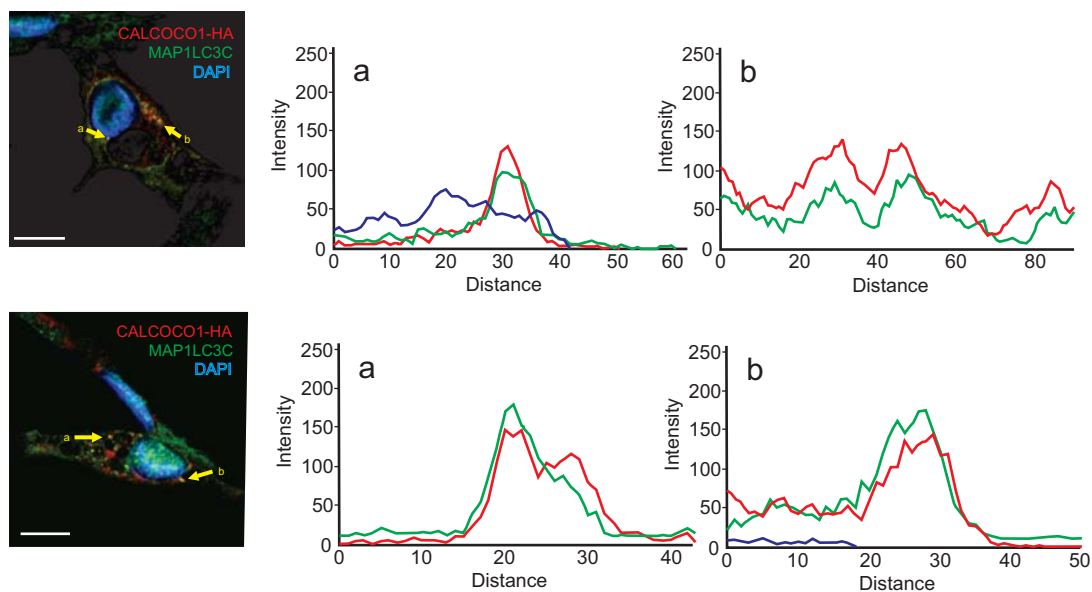

**(B)**

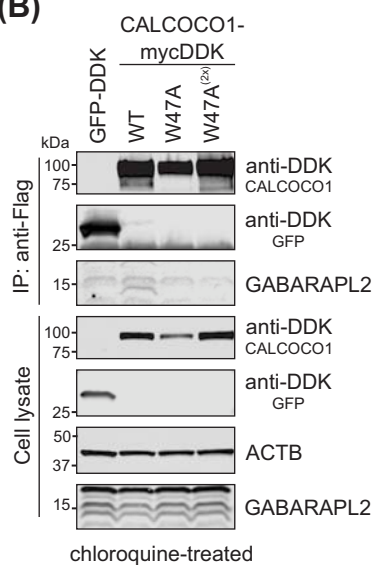

**(C)**

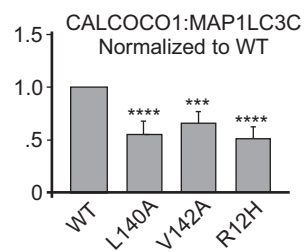

Figure S5, related to Fig. 6

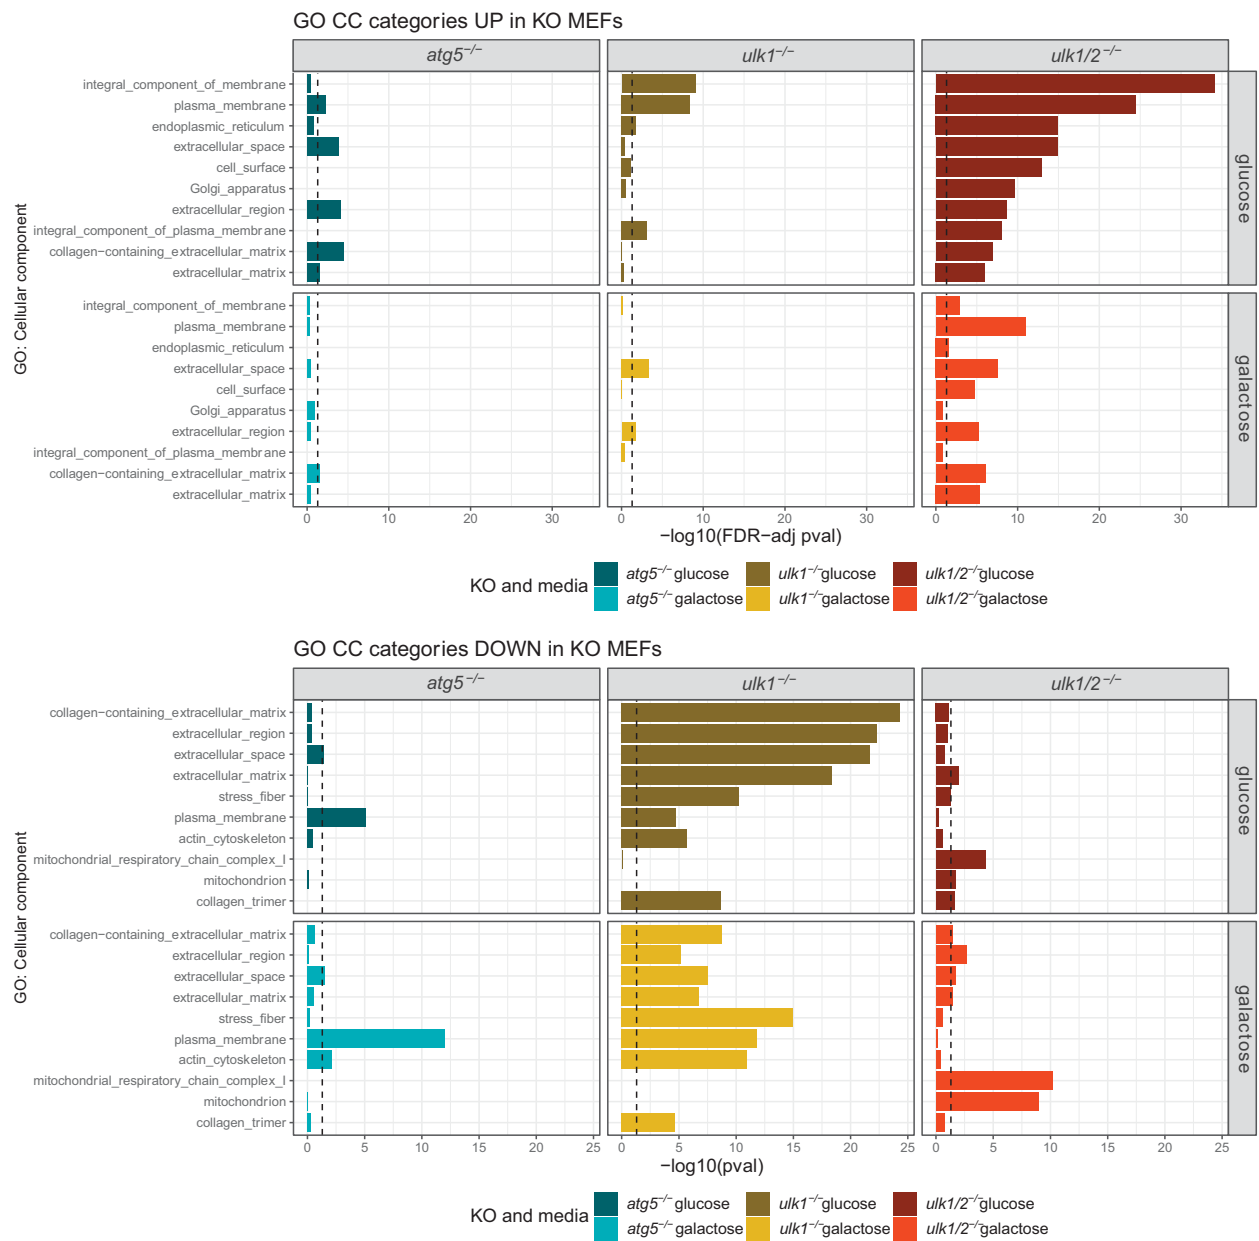

Figure S6, related to Fig. 6

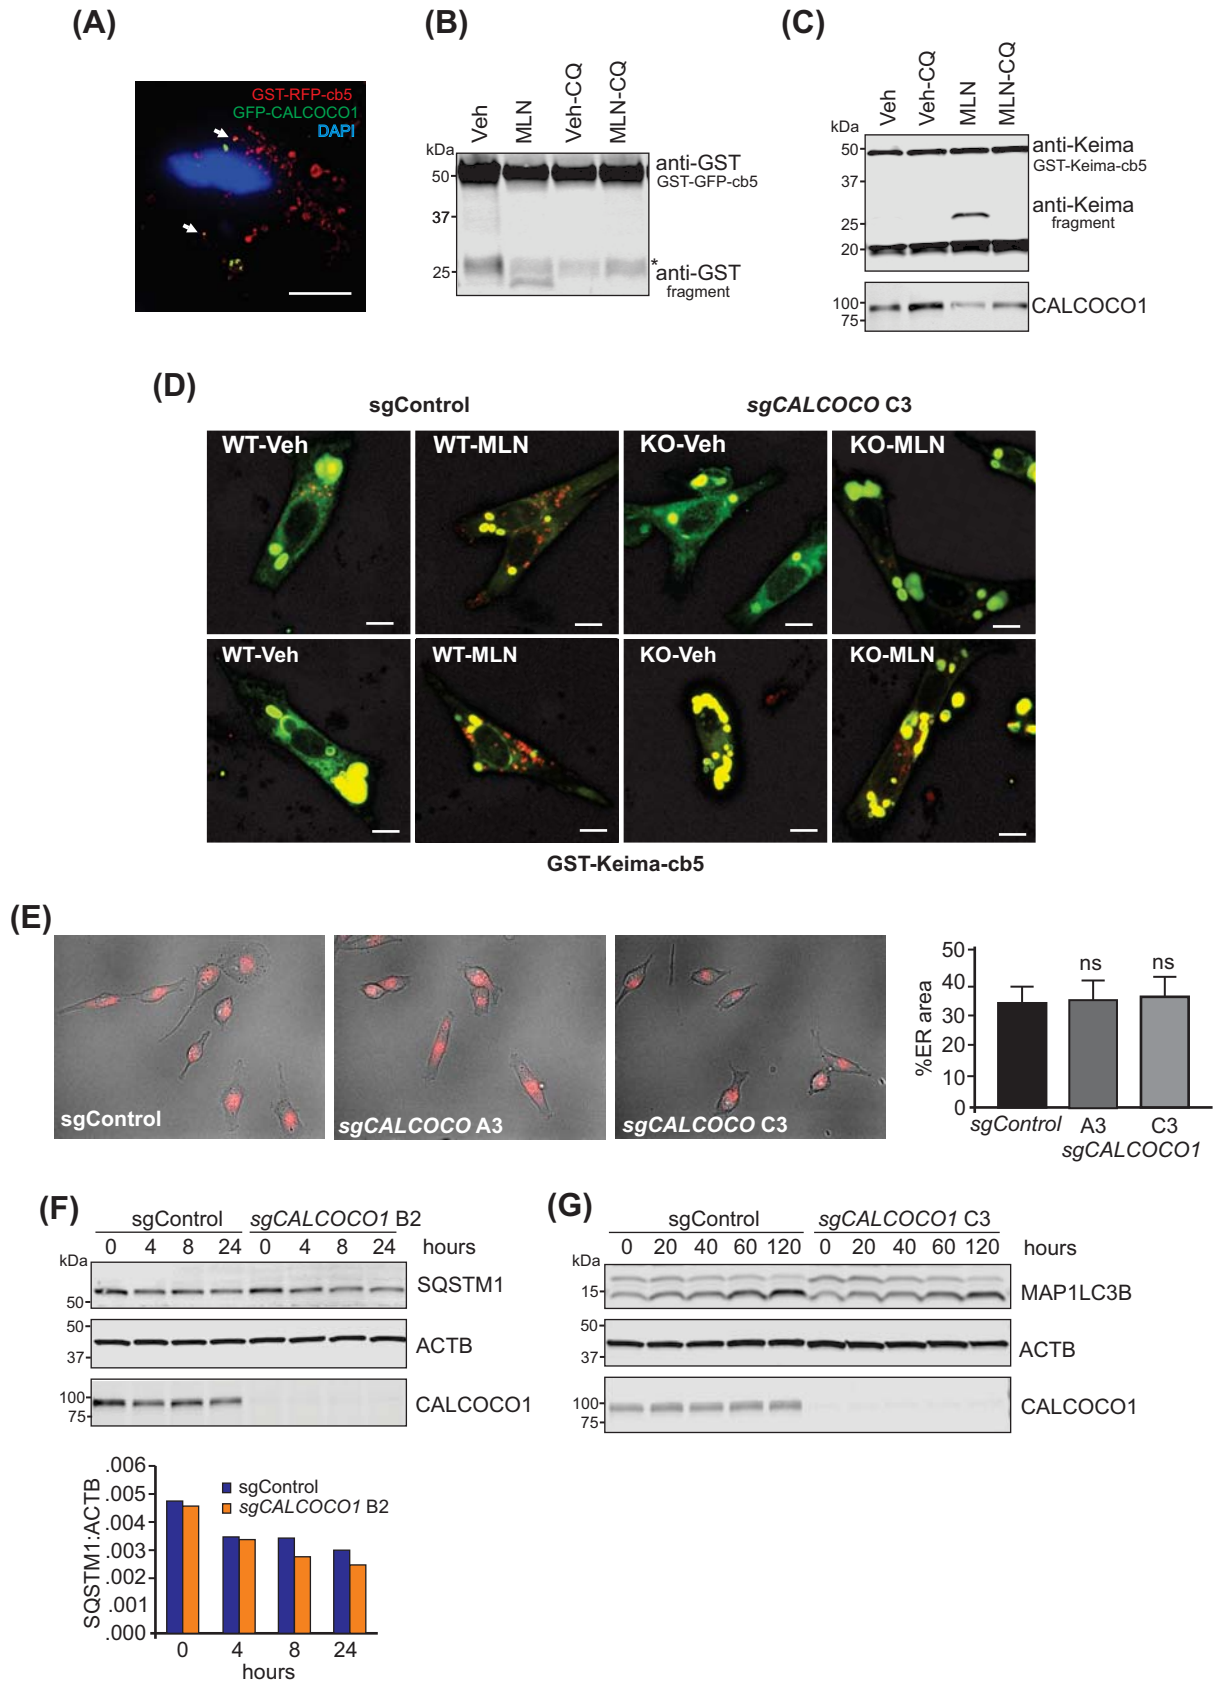

Supplement: Supplementary file 2 [file 1]
